# Supplementary material for: Surface modification of carbon nanotubes by combination of mussel inspired chemistry and SET-LRP
Source: Royal Society of Chemistry journal article supplement (doi:10.1039/c4py01565g), 2014-12-10
Supplement: c4py01565g1.pdf [file c4py01565g1.pdf]

Surface Modification of Carbon Nanotubes via Combination of Mussel Inspired Chemistry and SET-LRP

Qing Wan<sup>a</sup>, Meiyong Liu<sup>a</sup>, Jianwen Tian<sup>a</sup>, Fengjie Deng<sup>a</sup>, Guangjian Zeng<sup>a</sup>, Zhen Li<sup>b</sup>, Ke Wang<sup>b</sup>,  
Qingsong Zhang<sup>b</sup>, Xiaoyong Zhang<sup>a,\*</sup> and Yen Wei<sup>b,\*</sup>

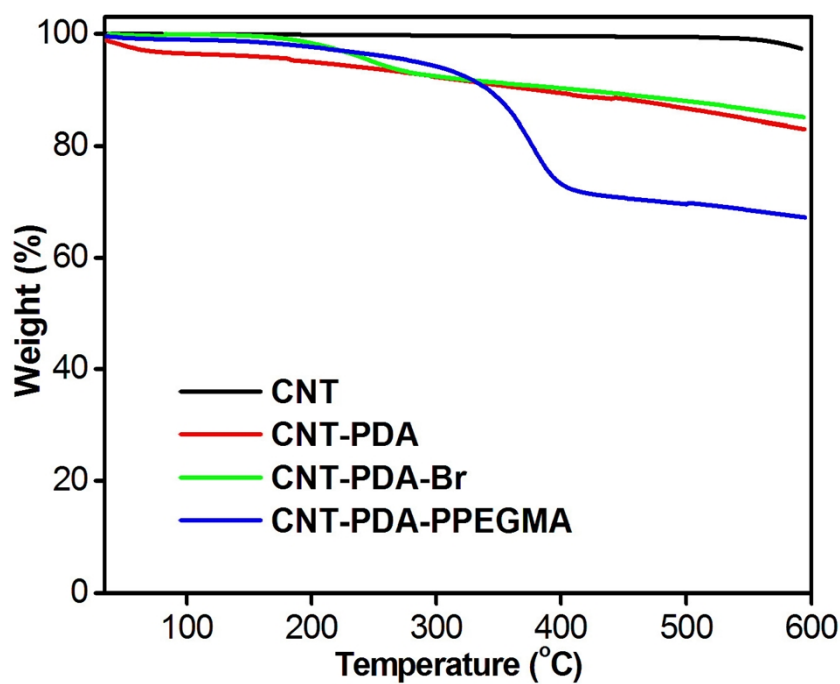

Fig. S1 TGA curves of CNTs, CNT-PDA, CNT-PDA-Br and CNT-PDA-PPEGMA
